# Supplementary material for: The bear circadian clock doesn’t ‘sleep’ during winter dormancy
Source: PubMed Central journal article supplement (PMC5026772; doi:10.1186/s12983-016-0173-x), 2016-09-17

FIGURE S1

Supplemental Information

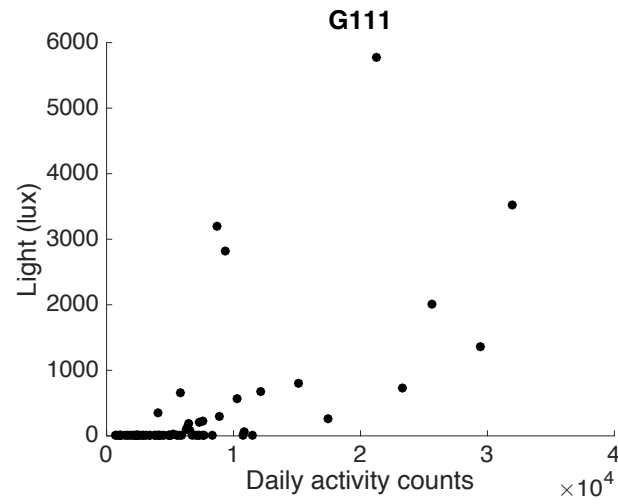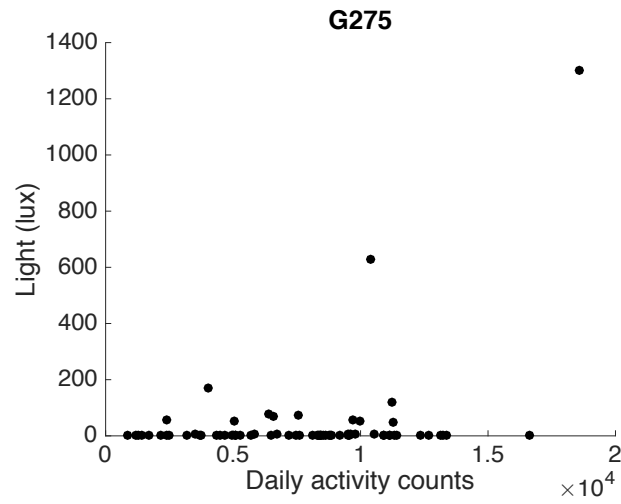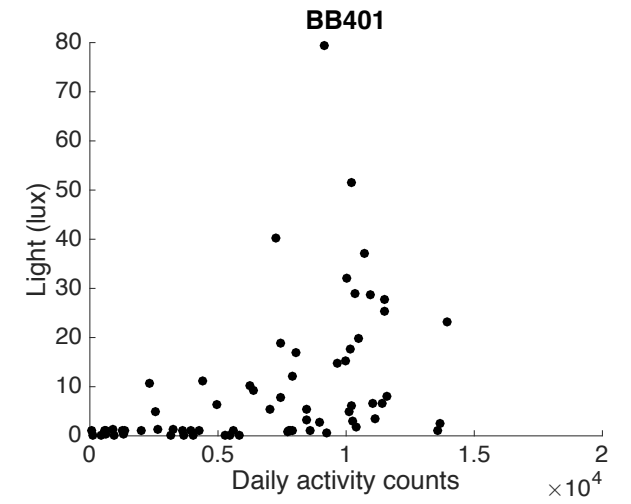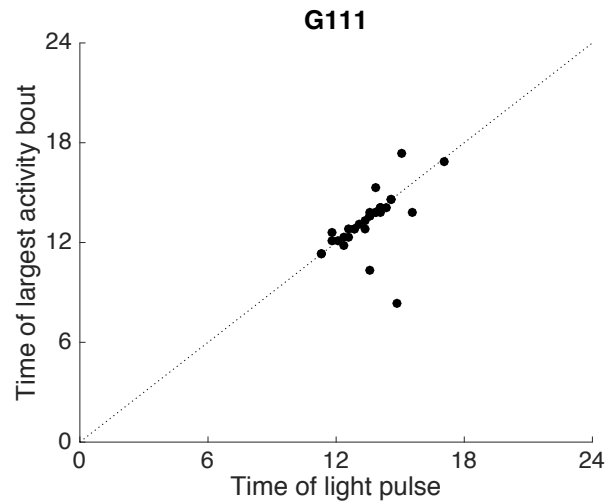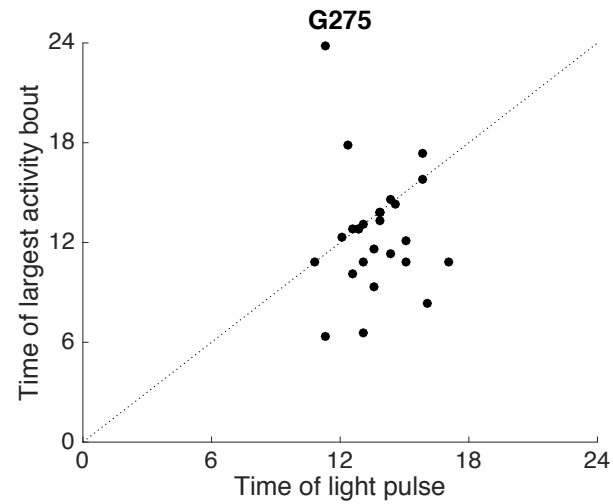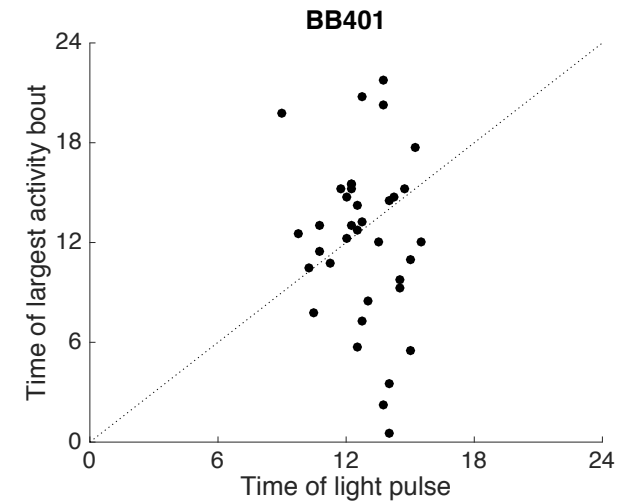

Supplement: 12983_2016_173_MOESM1_ESM.pdf [file 12983_2016_173_MOESM1_ESM.pdf]
